# Supplementary material for: Lanthanum bismuth oxide photocatalysts for CO2reduction to CO with high selectivity
Source: Royal Society of Chemistry journal article supplement (doi:10.1039/d1se00245g), 2021-01-01
Supplement: d1se00245g1.pdf [file d1se00245g1.pdf]

## Supporting Information

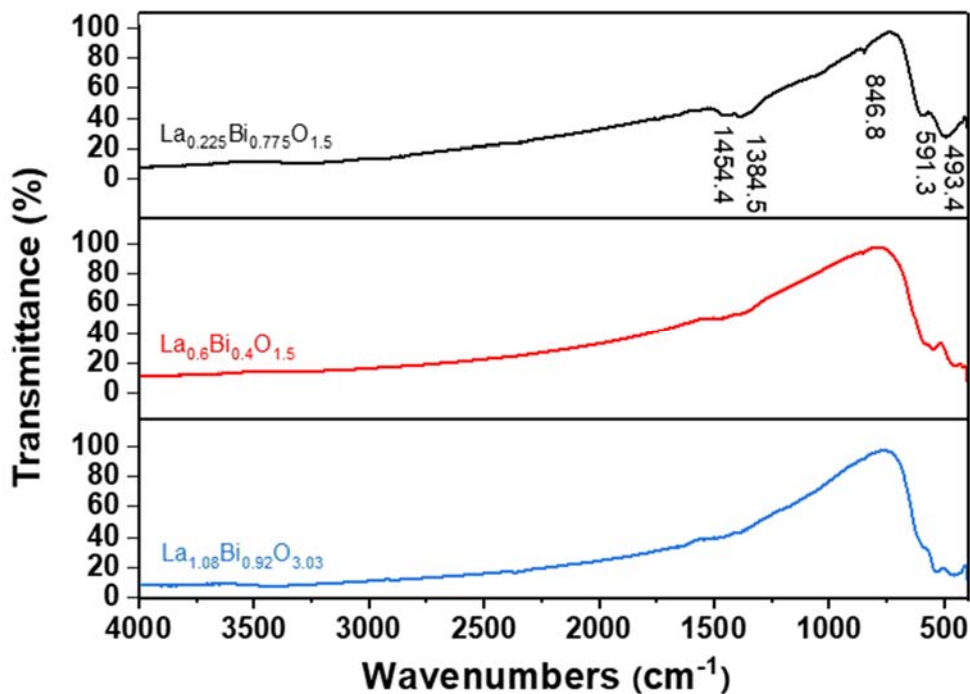

Fig. S1. FT-IR spectra of the  $\text{La}_{0.225}\text{Bi}_{0.775}\text{O}_{1.5}$ ,  $\text{La}_{0.6}\text{Bi}_{0.4}\text{O}_{1.5}$ , and  $\text{La}_{1.08}\text{Bi}_{0.92}\text{O}_{3.03}$  samples.

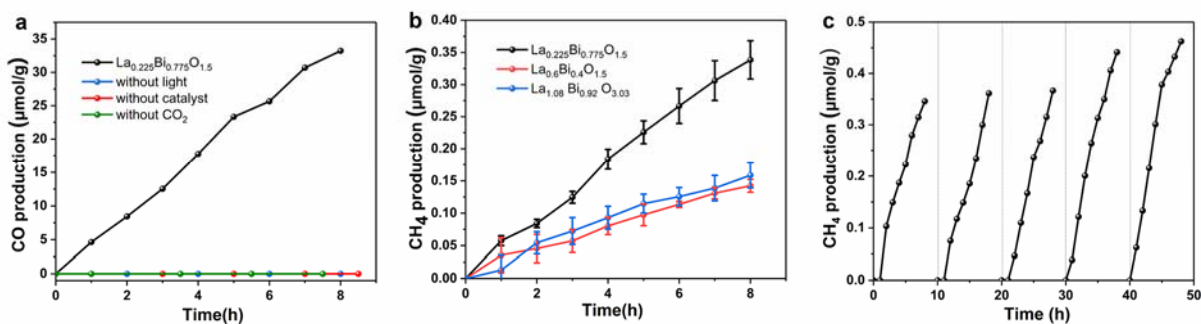

Fig. S2. (a) Products detected in three blank reactions of  $\text{La}_{0.225}\text{Bi}_{0.775}\text{O}_{1.5}$ . (b) Product yields of  $\text{CH}_4$  over  $\text{La}_{0.225}\text{Bi}_{0.775}\text{O}_{1.5}$ ,  $\text{La}_{0.6}\text{Bi}_{0.4}\text{O}_{1.5}$ , and  $\text{La}_{1.08}\text{Bi}_{0.92}\text{O}_{3.03}$  and (c) stability test of  $\text{CH}_4$  performed in five cycles over  $\text{La}_{0.225}\text{Bi}_{0.775}\text{O}_{1.5}$ .

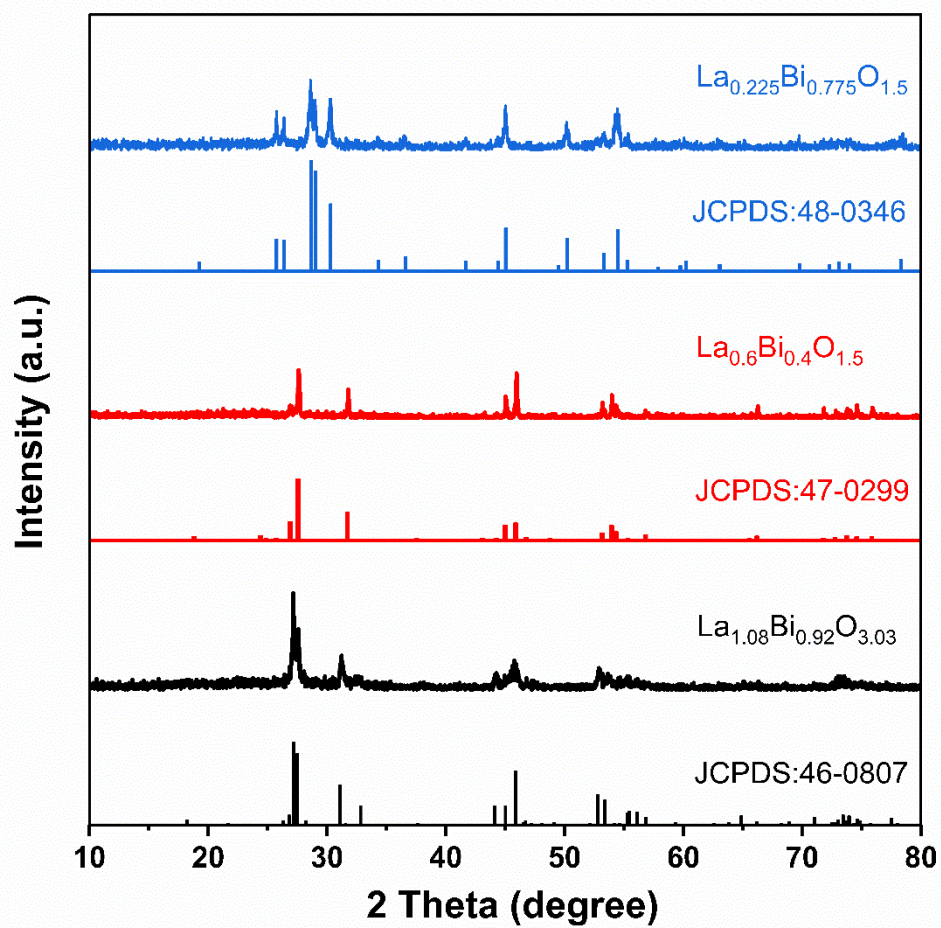

Fig. S3. XRD patterns of  $\text{La}_{0.225}\text{Bi}_{0.775}\text{O}_{1.5}$ ,  $\text{La}_{0.6}\text{Bi}_{0.4}\text{O}_{1.5}$ , and  $\text{La}_{1.08}\text{Bi}_{0.92}\text{O}_{3.03}$  after the photocatalytic reduction process.

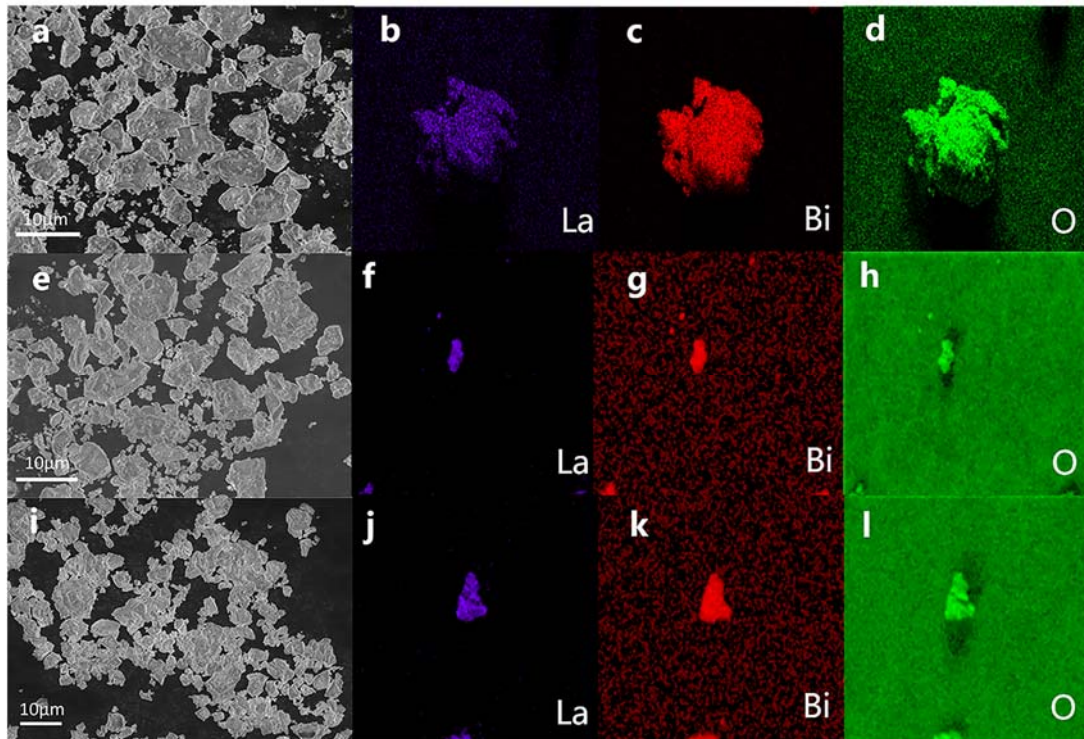

Figure S4. SEM images of (a)  $\text{La}_{0.225}\text{Bi}_{0.775}\text{O}_{1.5}$ , (e)  $\text{La}_{0.6}\text{Bi}_{0.4}\text{O}_{1.5}$ , and (i)  $\text{La}_{1.08}\text{Bi}_{0.92}\text{O}_{3.03}$  and EDX elemental mapping images of (b, c, d)  $\text{La}_{0.225}\text{Bi}_{0.775}\text{O}_{1.5}$ , (f, g, h)  $\text{La}_{0.6}\text{Bi}_{0.4}\text{O}_{1.5}$ , (j, k, l) and  $\text{La}_{1.08}\text{Bi}_{0.92}\text{O}_{3.03}$  before the photocatalytic reduction process. Images (a), (e), and (i) are the same images as those in Figs. 5(a), 5(b), and 5(c), respectively.

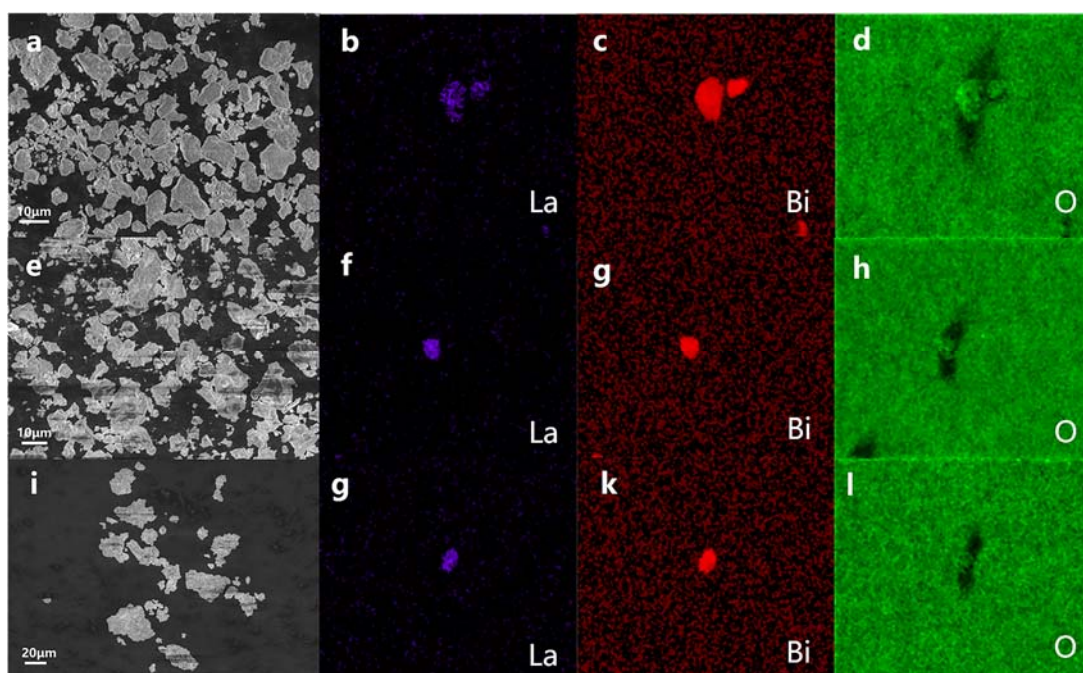

Fig. S5. (a) SEM images of  $\text{La}_{0.225}\text{Bi}_{0.775}\text{O}_{1.5}$ , (e)  $\text{La}_{0.6}\text{Bi}_{0.4}\text{O}_{1.5}$ , and (f)  $\text{La}_{1.08}\text{Bi}_{0.92}\text{O}_{3.03}$  after the photocatalytic reduction process. EDX elemental mapping images of (b, c, d)  $\text{La}_{0.225}\text{Bi}_{0.775}\text{O}_{1.5}$ , (f, g, h)  $\text{La}_{0.6}\text{Bi}_{0.4}\text{O}_{1.5}$ , and (g, k, l)  $\text{La}_{1.08}\text{Bi}_{0.92}\text{O}_{3.03}$  after the photocatalytic reduction process.

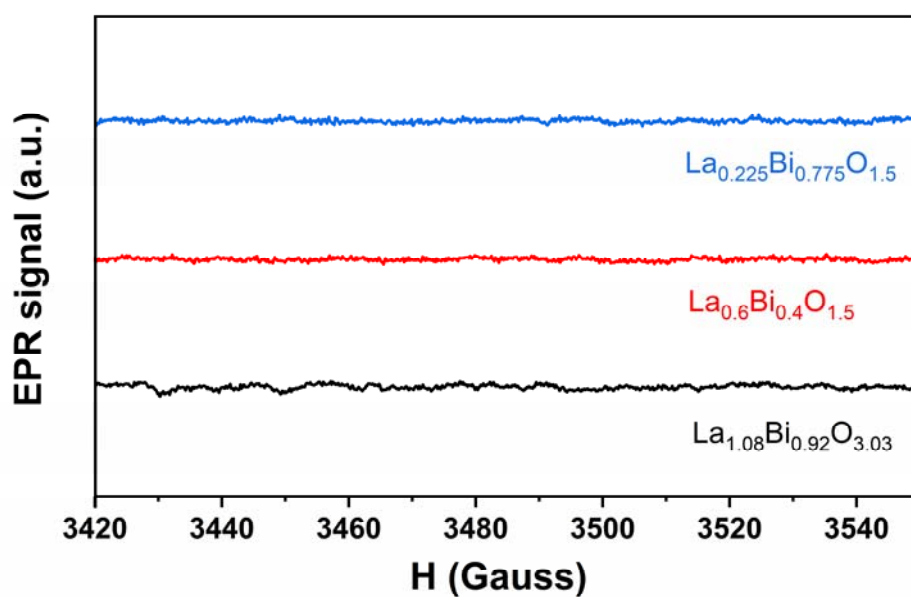

Fig. S6. EPR spectra of the  $\text{La}_{0.225}\text{Bi}_{0.775}\text{O}_{1.5}$ ,  $\text{La}_{0.6}\text{Bi}_{0.4}\text{O}_{1.5}$ , and  $\text{La}_{1.08}\text{Bi}_{0.92}\text{O}_{3.03}$  samples.



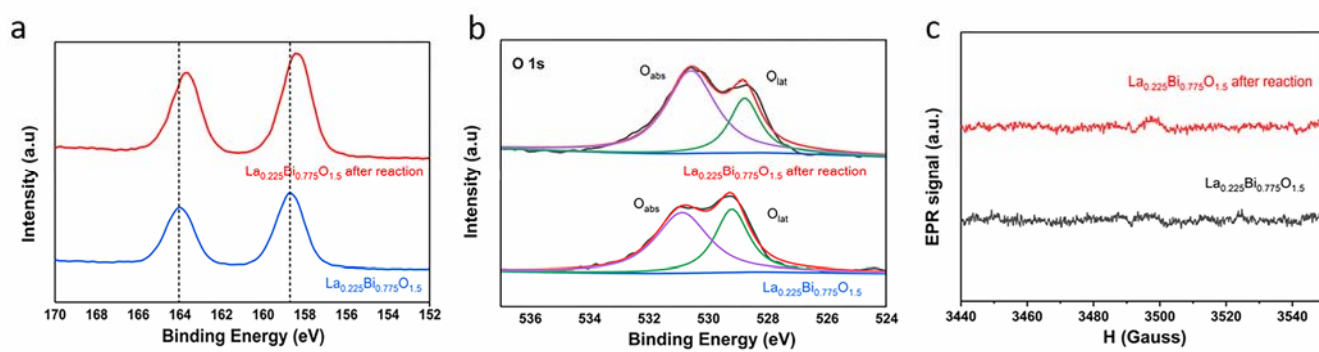

Fig. S7. (a) Bi 4f and (b) O 1s XPS spectra and (c) EPR spectra of  $\text{La}_{0.225}\text{Bi}_{0.775}\text{O}_{1.5}$  before and after the photocatalytic reduction process.

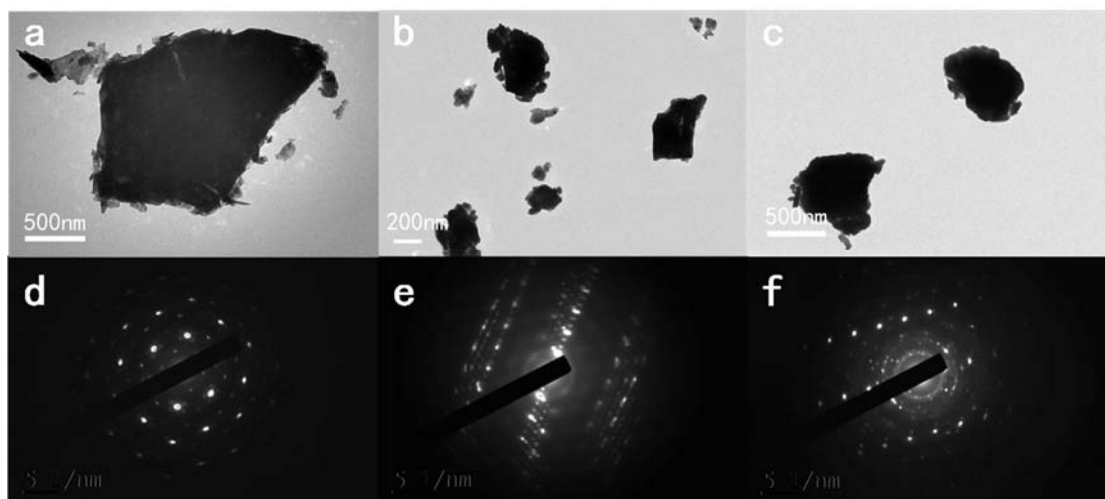

Fig. S8. TEM images of (a)  $\text{La}_{0.225}\text{Bi}_{0.775}\text{O}_{1.5}$ , (b)  $\text{La}_{0.6}\text{Bi}_{0.4}\text{O}_{1.5}$ , and (c)  $\text{La}_{1.08}\text{Bi}_{0.92}\text{O}_{3.03}$  samples and SAED patterns of (d)  $\text{La}_{0.225}\text{Bi}_{0.775}\text{O}_{1.5}$ , (e)  $\text{La}_{0.6}\text{Bi}_{0.4}\text{O}_{1.5}$ , and (f)  $\text{La}_{1.08}\text{Bi}_{0.92}\text{O}_{3.03}$ .

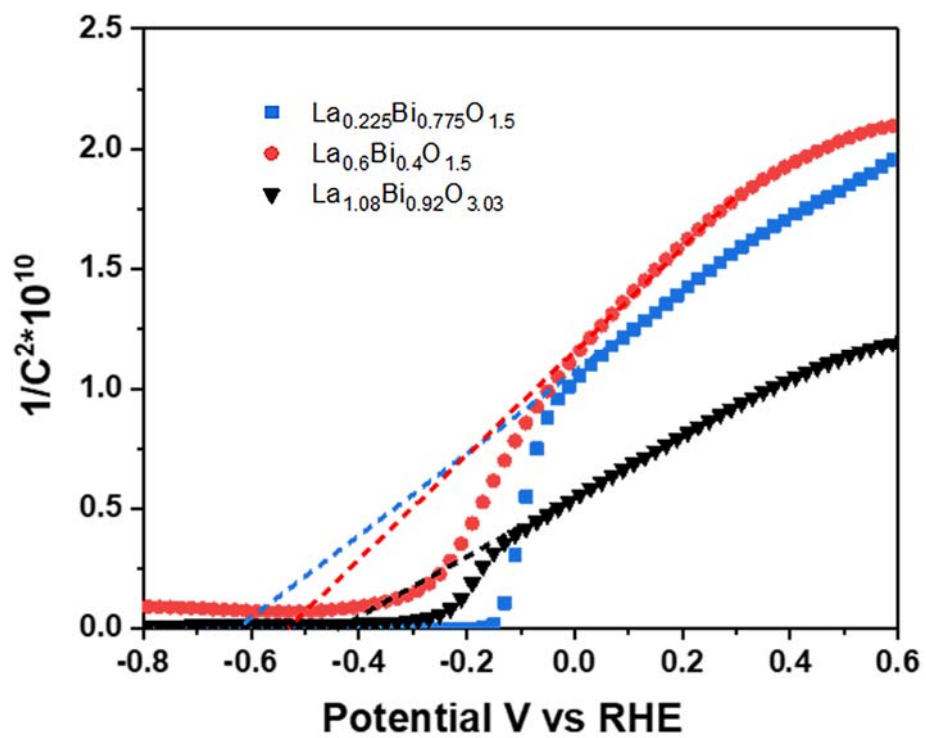

Fig. S9. Mott-Schottky plots of  $\text{La}_{0.225}\text{Bi}_{0.775}\text{O}_{1.5}$ ,  $\text{La}_{0.6}\text{Bi}_{0.4}\text{O}_{1.5}$ , and  $\text{La}_{1.08}\text{Bi}_{0.92}\text{O}_{3.03}$ .

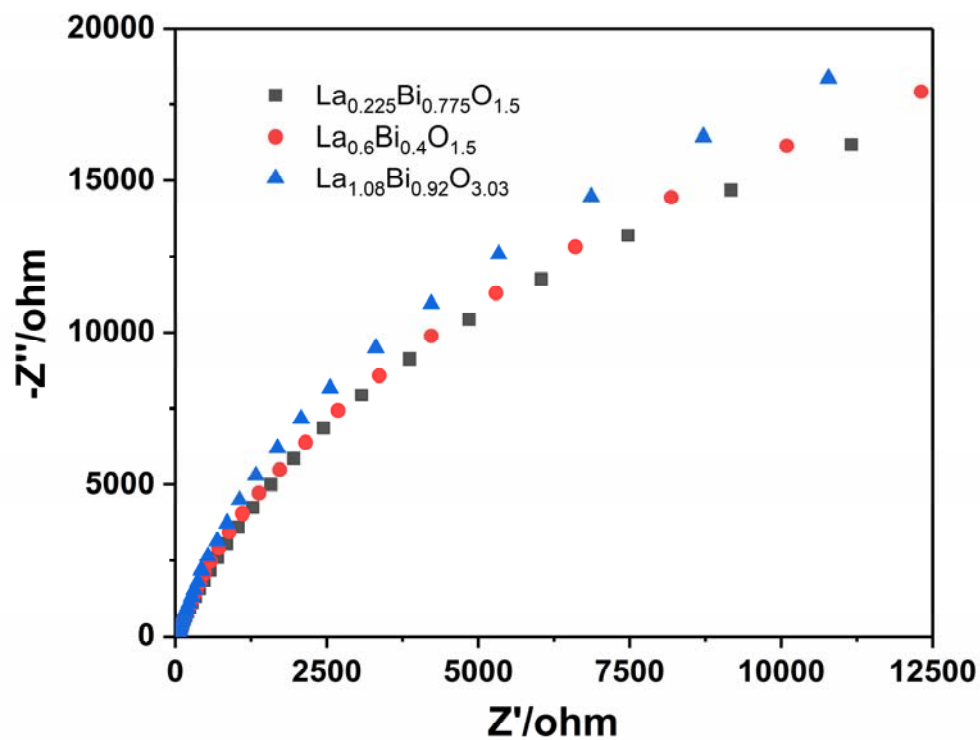

Fig. S10. Electrochemical impedance spectra of  $\text{La}_{0.225}\text{Bi}_{0.775}\text{O}_{1.5}$ ,  $\text{La}_{0.6}\text{Bi}_{0.4}\text{O}_{1.5}$ , and  $\text{La}_{1.08}\text{Bi}_{0.92}\text{O}_{3.03}$ .

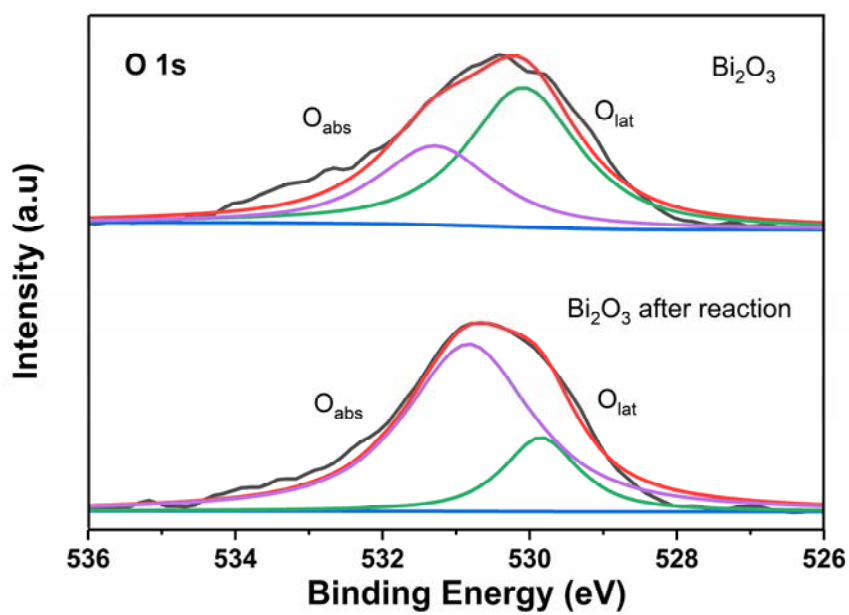

Fig. S11 O1s XPS spectra of  $\text{Bi}_2\text{O}_3$  before and after the photocatalytic reduction process.

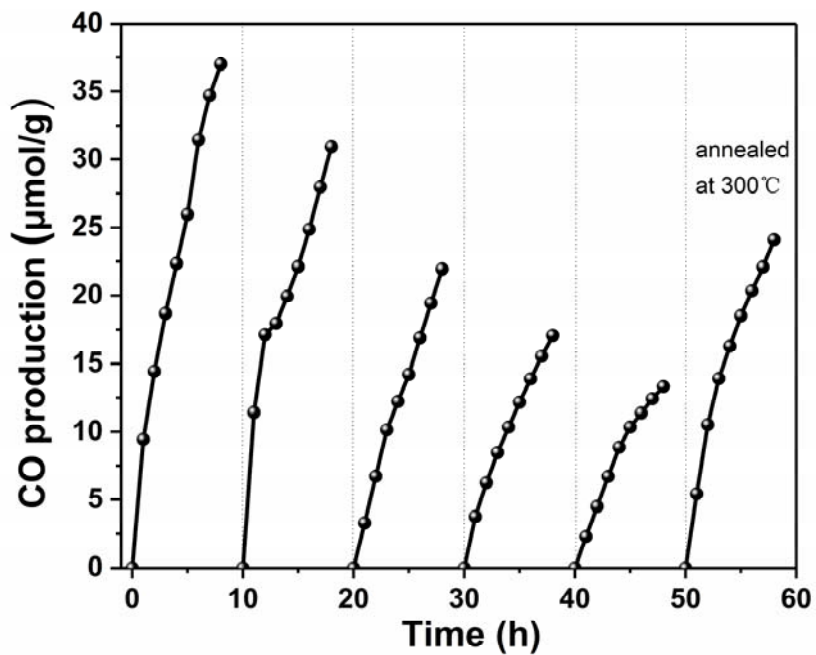

Fig. S12 Product yields of CO over  $\text{La}_{0.225}\text{Bi}_{0.775}\text{O}_{1.5}$  in five cycles and after annealing at 300 °C.

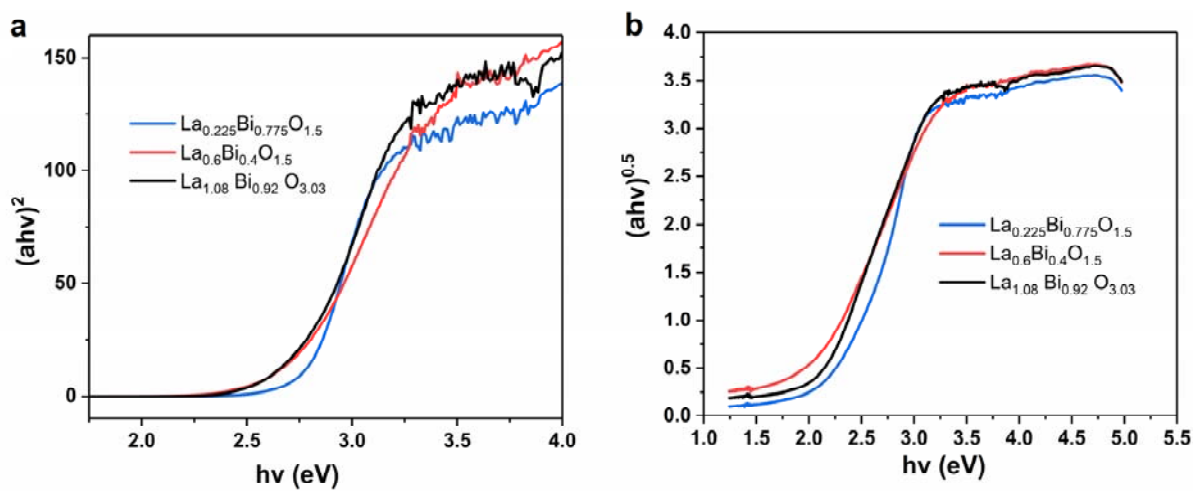

Fig. S13 Relationship between  $(ahv)^n$  and  $h\nu$  when (a)  $n=2$  and (b)  $n=0.5$ .



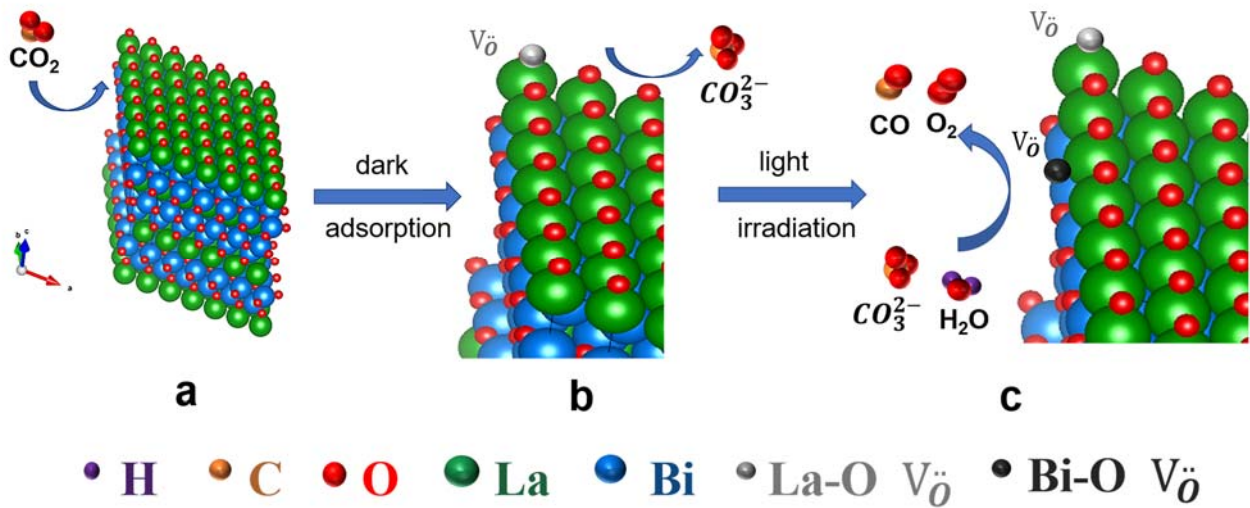

Scheme S1. (a, b) Adsorption process under dark conditions and (c) the lattice oxygen of  $\text{La}_{0.225}\text{Bi}_{0.775}\text{O}_{1.5}$  involved in photocatalytic reduction under light irradiation.

Table S1. Fluorescence emission decay parameters of these La-Bi-O samples

| Sample                                             | $\tau_1$ ( $\mu\text{s}$ ) | $I_1$ (%) | $\tau_2$ ( $\mu\text{s}$ ) | $I_2$ (%) | $\tau_3$ ( $\mu\text{s}$ ) | $I_3$ (%) | Ave. $\tau$ ( $\mu\text{s}$ ) |
|----------------------------------------------------|----------------------------|-----------|----------------------------|-----------|----------------------------|-----------|-------------------------------|
| $\text{La}_{0.225}\text{Bi}_{0.775}\text{O}_{1.5}$ | 0.88                       | 51.45     | 12.1                       | 12.43     | 129                        | 36.12     | 48.4                          |
| $\text{La}_{0.6}\text{Bi}_{0.4}\text{O}_{1.5}$     | 0.88                       | 67.76     | 11.4                       | 12.53     | 112                        | 19.71     | 24.2                          |
| $\text{La}_{1.08}\text{Bi}_{0.92}\text{O}_{3.03}$  | 0.96                       | 59.39     | 13.6                       | 18.52     | 117                        | 22.10     | 29.0                          |
